# Supplementary material
Source: PubMed Central journal article supplement (PMC8112895)
Supplement: mmc1.pdf [file mmc1.pdf]

# Supplementary Materials

## Deep learning for predicting COVID-19 malignant progression

Cong Fang<sup>a,1</sup>, Song Bai<sup>b,1</sup>, Qianlan Chen<sup>c,1</sup>, Yu Zhou<sup>a</sup>, Liming Xia<sup>c</sup>, Lixin Qin<sup>d</sup>, Shi Gong<sup>a</sup>, Xudong Xie<sup>a</sup>, Chunhua Zhou<sup>d</sup>, Dandan Tu<sup>c</sup>, Changzheng Zhang<sup>e</sup>, Xiaowu Liu<sup>e</sup>, Weiwei Chen<sup>c,\*</sup>, Xiang Bai<sup>a,\*</sup>, Philip H.S. Torr<sup>b</sup>

<sup>a</sup>School of Electronic Information and Communications, Huazhong University of Science and Technology, Wuhan 430074, China.

<sup>b</sup>Department of Engineering Science, University of Oxford, Parks Road, Oxford OX1 3PJ, United Kingdom.

<sup>c</sup>Department of Radiology, Tongji Hospital, Tongji Medical College, Huazhong University of Science and Technology, Wuhan 430030, China.

<sup>d</sup>Department of Radiology, Wuhan Pulmonary Hospital, Wuhan 430030, China.

<sup>e</sup>HUST-HW Joint Innovation Lab, Wuhan 430074, China.

\*Corresponding author.

Email addresses: chenweiwei\_tjh@163.com (Weiwei Chen), xbai@hust.edu.cn (Xiang Bai)

<sup>1</sup>These authors contributed equally to this work and should be considered as co-first authors

## 1 **Supplementary methods**

2 **Attention weights updating.** In each mini-batch of the training process, the exponential moving average  
3 is used to update the attention weights in the training set. In the testing process, the average weights  
4 obtained in the training process are used to update the clinical data. The attention weights are updated as:

$$5 \quad A_i = \begin{cases} A_c, & i = 1 \\ \alpha \cdot A_c + (1 - \alpha) \cdot A_{i-1}, & i > 1 \end{cases} \quad (1)$$

6 where  $A_i$  is the average attention weights;  $A_c$  is the current attention weights; the coefficient  $\alpha$  represents  
7 the degree of weighting decrease, a constant smoothing factor between 0 and 1;  $i$  is the number of  
8 iterations in the training process. In our experiment  $\alpha$  is 0.1.

9 **Statistic metric.** The following 4 metrics are used to evaluate the performance.

### 10 **1. AUC:**

$$11 \quad AUC = \sum_{i=1}^n TPR_i \times (FPR_i - FPR_{i-1}) \quad (2)$$

12 where  $T = [th_1, th_2, \dots, th_n]$ ,  $0 \leq th_i \leq 1$ ,  $th_i < th_{i+1}$ ,  $TPR_i = \frac{TP}{TP+FN}$  and  $FPR_i = 1 -$

13  $\frac{TN}{FP+TN}$  both with a threshold =  $T[i]$ .

### 14 **2. accuracy:**

$$15 \quad accuracy = \frac{TP+TN}{TP+TN+FP+FN}, \text{ with a threshold} = 0.5 \quad (3)$$

### 16 **3. sensitivity:**

$$17 \quad sensitivity = \frac{TP}{TP+FN}, \text{ with a threshold} = 0.5 \quad (4)$$

### 18 **4. specificity:**

$$19 \quad specificity = \frac{TN}{FP+TN}, \text{ with a threshold} = 0.5 \quad (5)$$

20 where TP is true positive, TN is true negative, FP is false positive and FN is false negative.

Supplementary Table 1. The detailed parameters of the 3D ResNet.

| <b>Layer name</b> | <b>Operation</b>                      | <b>Input size</b>                  | <b>Output size</b>                 |
|-------------------|---------------------------------------|------------------------------------|------------------------------------|
| Conv1             | $3 \times 3 \times 3$ , 32, stride 2  | $64 \times 64 \times 64 \times 1$  | $32 \times 32 \times 32 \times 32$ |
| Block1            | $3 \times 3 \times 3$ , 32, stride 2  | $32 \times 32 \times 32 \times 32$ | $16 \times 16 \times 16 \times 32$ |
|                   | $3 \times 3 \times 3$ , 32, stride 1  |                                    |                                    |
| Block2            | $3 \times 3 \times 3$ , 64, stride 2  | $16 \times 16 \times 16 \times 32$ | $8 \times 8 \times 8 \times 64$    |
|                   | $3 \times 3 \times 3$ , 64, stride 1  |                                    |                                    |
| Block3            | $3 \times 3 \times 3$ , 128, stride 2 | $8 \times 8 \times 8 \times 64$    | $4 \times 4 \times 4 \times 128$   |
|                   | $3 \times 3 \times 3$ , 128, stride 1 |                                    |                                    |
| Pooling           | global average pooling                | $4 \times 4 \times 4 \times 128$   | $1 \times 1 \times 1 \times 128$   |

Supplementary Table 2. The performance comparison of different data fusion strategies and different ratio of clinical and CT feature dimensions. 95% confidence intervals are included in brackets. The best average results are shown in **bold**. The  $p < 0.05$  indicates our method significantly improves the compared method (McNemar's test). Abbreviations: area under the receiver operating characteristic curve (AUC); accuracy (ACC); sensitivity (SENS); specificity (SPEC).

| Fusion strategy | Feature dimension         | AUC                       | ACC (%)                | SEN (%)                | SPEC (%)               | p-value |
|-----------------|---------------------------|---------------------------|------------------------|------------------------|------------------------|---------|
| Early fusion    | 61 / 64 (Clinical / CT)   | 0.871[0.839,0.904]        | 84.7[81.5,87.5]        | 72.7[64.4,79.6]        | 88.5[85.0,91.2]        | 0.001   |
| Early fusion    | 61 / 128 (Clinical / CT)  | <b>0.920[0.861,0.979]</b> | <b>87.7[84.7,90.2]</b> | <b>89.1[82.5,93.4]</b> | 87.3[83.7,90.1]        | *(base) |
| Early fusion    | 61 / 256 (Clinical / CT)  | 0.752[0.710,0.794]        | 78.9[75.2,82.1]        | 28.1[21.1,36.5]        | <b>94.5[91.8,96.3]</b> | <0.001  |
| Late fusion     | 61 / 64 (Clinical / CT)   | 0.883[0.851,0.914]        | 84.2[80.9,87.0]        | 78.1[70.2,84.4]        | 86.1[82.4,89.1]        | 0.001   |
| Late fusion     | 61 / 128 (Clinical / CT)  | 0.860[0.827,0.894]        | 84.6[81.3,87.4]        | 74.2[66.0-81.0]        | 87.7[84.2,90.6]        | <0.001  |
| Late fusion     | 61 / 256 (Clinical / CT)  | 0.844[0.809,0.879]        | 81.6[78.1,84.6]        | 65.6[57.0,73.3]        | 86.5[82.9,89.5]        | <0.001  |
| Temporal fusion | 128 / 128 (Clinical / CT) | 0.787[0.747,0.827]        | 77.9[74.3,81.2]        | 58.6[49.9,66.8]        | 83.9[80.1,87.1]        | <0.001  |

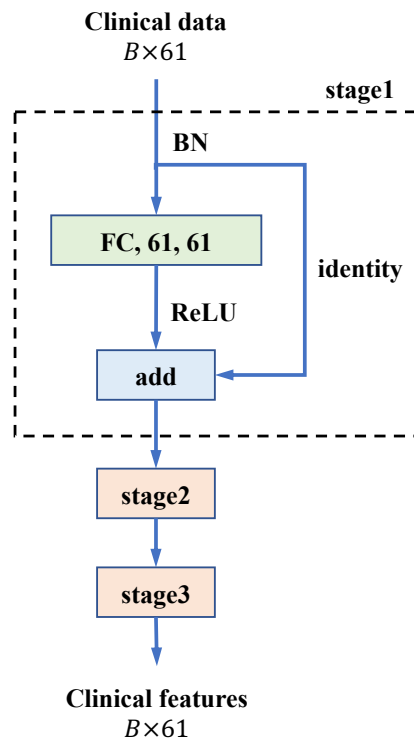

21 **Supplementary Figure 1. Clinical data encoder.** This encoder has three stages, each of which consists  
 22 of a fully connected layer and an identity connection. BN: batch normalization, add: pixel-wise addition,  
 23 identity: identity connection. FC, 61, 61 represents a fully connected layer, the size of input features, and  
 24 the size of output features.  $B \times 61$  represents the batch size and the length of the vector.

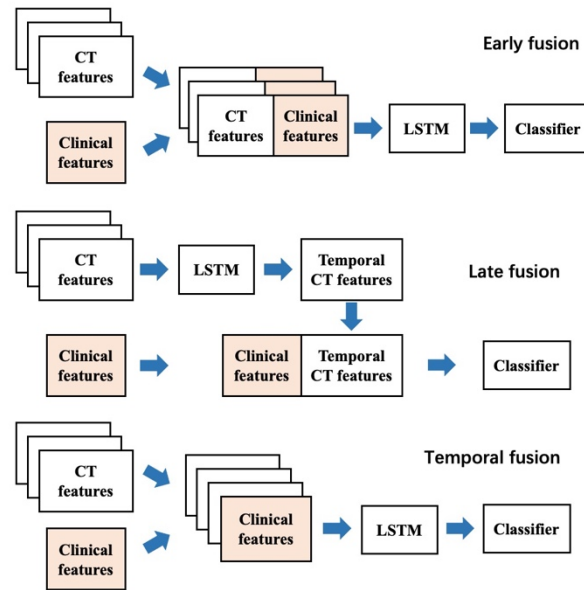

25 **Supplementary Figure 2. Fusion strategies of clinical features and CT features.** Early fusion: CT  
 26 features at each time point are concatenated with clinical features before fed into LSTM. Late fusion:  
 27 The output of LSTM is concatenated with clinical features before fed into the classifier. Temporal fusion:  
 28 The clinical features are considered as preliminary information before the CT scan sequence and fed into  
 29 LSTM as the features at the first time point.

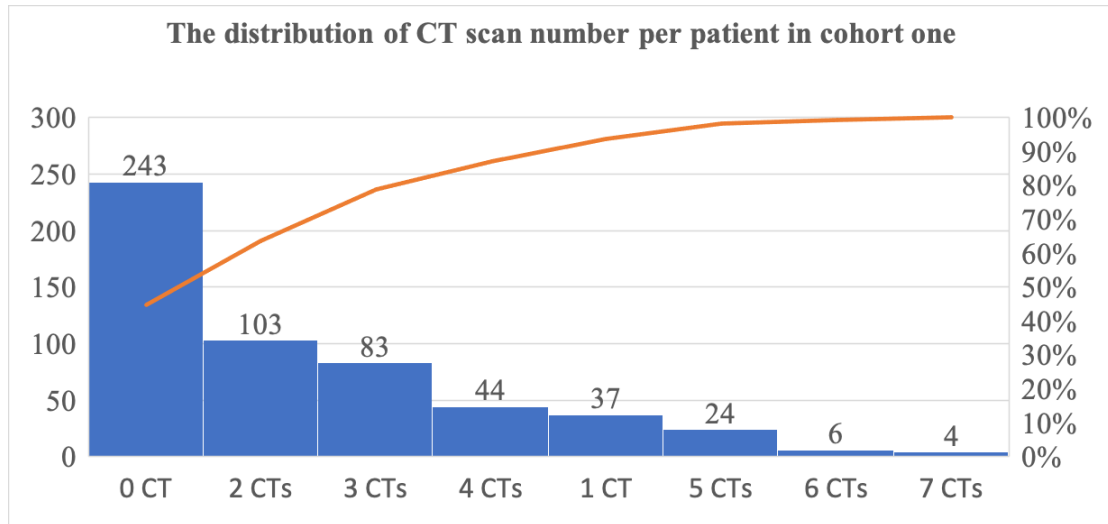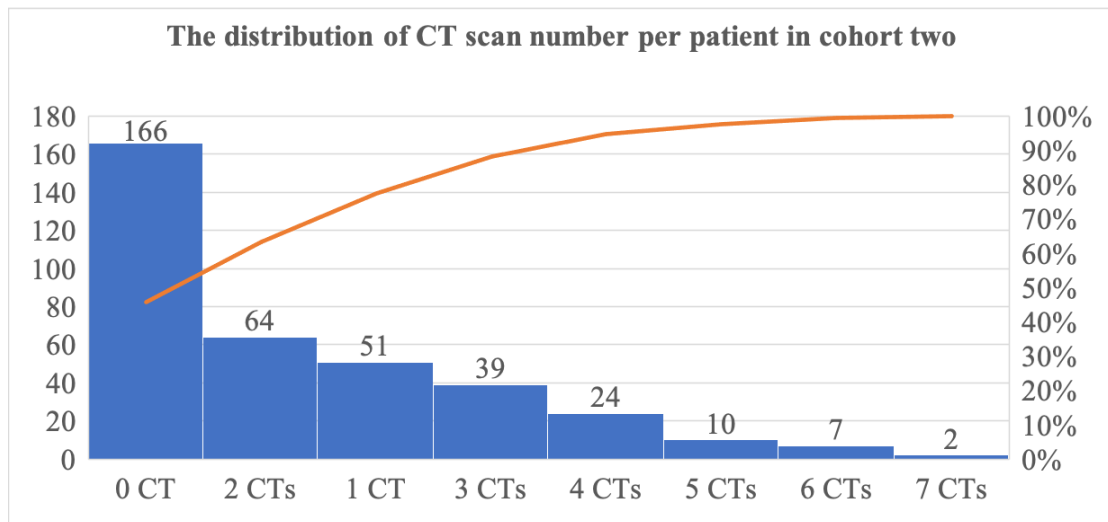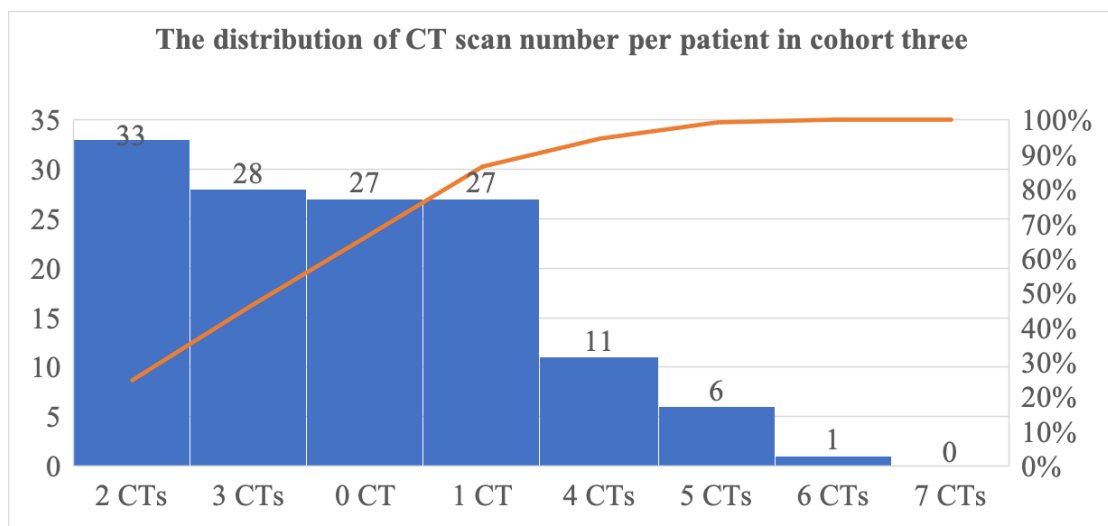

30 **Supplementary Figure 3. The distribution of CT scan numbers per patient in three cohorts. The**  
 31 **ordinate is the number of patients and the abscissa is the number of CT scans per patient.**
